# Supplementary material for: A Coxiella mutualist symbiont is essential to the development of Rhipicephalus microplus
Source: PubMed Central journal article supplement (PMC5730597; doi:10.1038/s41598-017-17309-x), 2017-12-14
Supplement: 41598_2017_17309_MOESM1_ESM.pdf [file 41598_2017_17309_MOESM1_ESM.pdf]

**Title:**

**A *Coxiella* mutualist symbiont is essential to the development of *Rhipicephalus microplus***

**Authors:**

Melina Garcia Guizzo<sup>1</sup>, Luís Fernando Parizi<sup>2</sup>, Rodrigo Dutra Nunes<sup>1</sup>, Renata Schama<sup>3</sup>, Rodolpho M. Albano<sup>4</sup>, Lucas Tirloni<sup>2</sup>, Daiane Patrícia Oldiges<sup>2</sup>, Ricardo Pilz Vieira<sup>1</sup>, Wanderson Henrique Cruz Oliveira<sup>6</sup>, Milane de Souza Leite<sup>6</sup>, Sergio A. Gonzales<sup>8</sup>, Marisa Farber<sup>8</sup>, Orlando Martins<sup>1</sup>, Itabajara da Silva Vaz Junior<sup>2,5,7</sup>, Pedro L. Oliveira<sup>1,7\*</sup>

| <b>Feature</b>     | <b>CERM</b> | <b>CRt</b> | <b>CLEAA</b> | <b>Cb</b> |
|--------------------|-------------|------------|--------------|-----------|
| Genome Size (Mbp)  | 1.19        | 1.7        | 0.66         | 1.99      |
| GC (%)             | 32.66       | 38.2       | 34.6         | 42.6      |
| Protein coding (%) | 56.4        | 48.5       | 83.9         | 89.1      |
| Genes              | 836         | 912        | 551          | 2,094     |
| Single copy genes  | 104/111     | 102/111    | 101/111      | 106/111   |

Table S1: Genomes of *Coxiella* endosymbionts of ticks. CERM – *Coxiella* endosymbiont from *R. microplus*; CRt – *Coxiella* endosymbiont from *R. turanicus*; *Coxiella* endosymbiont from *A. americanum*; Cb – *Coxiella burnetii* RSA 493.

| <b>Biosynthetic pathway</b> | <b>CERM</b> | <b>CRt</b>     | <b>CLEAA</b>   |
|-----------------------------|-------------|----------------|----------------|
| <b>Vitamins</b>             |             |                |                |
| <b>Biotin (B7)</b>          |             |                |                |
| bioC                        | CLERM_746   | WP_048875477.1 | WP_084588734.1 |
| bioH                        | CLERM_627   | WP_048875315.1 | WP_039670095   |
| bioF                        | CLERM_628   | WP_048875316.1 | WP_039670096   |
| bioA                        | CLERM_630   | WP_048875318   | WP_039670098.1 |
| bioD                        | CLERM_625   | WP_048875796.1 | WP_052246377.1 |
| bioB                        | CLERM_629   | WP_048875317.1 | WP_039670097.1 |
| <b>Riboflavin (B2)</b>      |             |                |                |
| ribA                        | CLERM_180   | WP_048875046.1 | WP_039669871.1 |
| ribD                        | CLERM_586   | WP_048875044.1 | WP_039669869.1 |

|                                                            |               |                |                |
|------------------------------------------------------------|---------------|----------------|----------------|
| ribH                                                       | CLERM_181     | WP_048875047.1 | WP_039669872.1 |
| ribE                                                       | CLERM_179     | WP_048875045.1 | WP_039669870.1 |
| <b>Pyridoxine (B6)</b>                                     |               |                |                |
| GAPDH                                                      | CLERM_412     | WP_048874822.1 | WP_039669757.1 |
| pdxB                                                       | CLERM_445     | WP_048874810.1 | WP_039669763   |
| serC                                                       | CLERM_670     | WP_048875157.1 | WP_039670132.1 |
| pdxA                                                       | CLERM_535     | WP_048875681.1 | WP_039669901.1 |
| pdxJ                                                       | CLERM_654     | WP_048874958.1 | WP_039669818.1 |
| pdxH                                                       | CLERM_431     | WP_048875231.1 | WP_039670071.1 |
| <b>Folic Acid (B9)</b>                                     |               |                |                |
| folE                                                       | CLERM_473     | WP_048875401.1 | WP_039670042.1 |
| folB                                                       | CLERM_275     | WP_048875676.1 | WP_039669906.1 |
| folK                                                       | CLERM_084     | WP_048875541.1 | WP_052246374.1 |
| folP                                                       | CLERM_217     | WP_048875417.1 | WP_039670037.1 |
| folC                                                       | CLERM_566     | WP_048875798.1 | WP_039670066.1 |
| folA                                                       | CLERM_231     | WP_048875685.1 | WP_052246324.1 |
| <b>Pantothenate (B5)</b>                                   |               |                |                |
| panB                                                       | CLERM_765     | WP_048875491.1 | WP_039670235.1 |
| panC                                                       | CLERM_766     | WP_048875492.1 | WP_039670003.1 |
| <b>Thiamine (B1)</b>                                       |               |                |                |
| thiC                                                       | <b>Absent</b> | <b>Absent</b>  | WP_052246335.1 |
| thiCDE                                                     | <b>Absent</b> | <b>Absent</b>  | WP_084588732.1 |
| nifS                                                       | CLERM_515     | WP_048875792.1 | WP_039670083.1 |
| ThiF                                                       | <b>Absent</b> | <b>Absent</b>  | WP_039669760.1 |
| thiFG                                                      | <b>Absent</b> | <b>Absent</b>  | WP_039669989.1 |
| <b>Nicotinate (B3)</b>                                     |               |                |                |
| nadB                                                       | <b>Absent</b> | <b>Absent</b>  | WP_039669917.1 |
| nadA                                                       | <b>Absent</b> | <b>Absent</b>  | WP_039670112.1 |
| nadC                                                       | <b>Absent</b> | <b>Absent</b>  | WP_039669915.1 |
| <b>Cofactors</b>                                           |               |                |                |
| <b>Flavin adenine dinucleotide (FAD)</b>                   |               |                |                |
| ribF                                                       | CLERM_259     | WP_048875815.1 | WP_052246375.1 |
| <b>Coenzyme A (CoA)</b>                                    |               |                |                |
| coaA                                                       | CLERM_270     | WP_048875600.1 | WP_052246330.1 |
| coaBC                                                      | CLERM_569     | WP_048875349.1 | WP_039670064.1 |
| coaD                                                       | CLERM_083     | WP_048875540.1 | WP_039669974.1 |
| coaE                                                       | CLERM_091     | WP_048875620.1 | WP_039669930.1 |
| <b>Nicotinamide adenine dinucleotide phosphate (NADP+)</b> |               |                |                |
| nadB                                                       | <b>Absent</b> | <b>Absent</b>  | WP_039669917.1 |
| nadA                                                       | <b>Absent</b> | <b>Absent</b>  | WP_039670112.1 |
| nadC                                                       | <b>Absent</b> | <b>Absent</b>  | WP_039669915.1 |
| nadD                                                       | CLERM_522     | WP_048875184.1 | WP_039670121.1 |
| nadE                                                       | CLERM_583     | WP_048875362.1 | WP_039670054.1 |
| ppnK                                                       | CLERM_641     | WP_048875461.1 | WP_039670015.1 |

Table S2: Biosynthetic pathways for the synthesis of vitamins and cofactors in *Coxiella* endosymbionts genomes. CERM – *Coxiella* endosymbiont from *R. microplus*; CRt – *Coxiella* endosymbiont from *R. turanicus*; CLEAA - *Coxiella* endosymbiont from *A. americanum*.

| Biosynthetic pathway                                                                               | CERM      | CRt            | CLEAA          |
|----------------------------------------------------------------------------------------------------|-----------|----------------|----------------|
| <b>Biosynthesis of essential aminoacids</b>                                                        |           |                |                |
| <b>Phenylalanine and tryptophan</b>                                                                |           |                |                |
| pyridoxal phosphate-dependent aminotransferase                                                     | CLERM_664 | WP_048875152   | WP_084588741.1 |
| 5-Enolpyruvylshikimate-3-phosphate synthase                                                        | CLERM_803 | WP_048875158.1 | WP_039670281.1 |
| 3-dehydroquinate dehydratase I                                                                     | CLERM_806 | WP_048875721.1 | WP_039670147.1 |
| 2-keto-3-deoxy-D-arabino-heptulosonate-7-phosphate synthase I alpha                                | CLERM_133 | WP_048875304.1 | WP_039670078.1 |
| Chorismate synthase                                                                                | CLERM_574 | WP_048875353.1 | WP_039670062.1 |
| Shikimate 5-dehydrogenase I alpha                                                                  | CLERM_662 | WP_048875740.1 | WP_039669745.1 |
| 3-dehydroquinate synthase                                                                          | CLERM_063 | WP_048874781.1 | WP_039669746.1 |
| Shikimate kinase I                                                                                 | CLERM_064 | WP_082160486.1 | WP_052246297.1 |
| <b>Threonine</b>                                                                                   |           |                |                |
| Phosphoserine aminotransferase                                                                     | CLERM_670 | WP_048875157.1 | WP_039670132.1 |
| 2-amino-3-ketobutyrate coenzyme A ligase                                                           | CLERM_836 | WP_048875640.1 | <b>Absent</b>  |
| Serine hydroxymethyltransferase                                                                    | CLERM_416 | WP_048875001.1 | WP_039669841.1 |
| <b>Valine, leucine and isoleucine</b>                                                              |           |                |                |
| Leucine dehydrogenase                                                                              | CLERM_280 | WP_048875043.1 | WP_039670196.1 |
| Dihydrolipoamide acyltransferase component of branched-chain alpha-keto acid dehydrogenase complex | CLERM_653 | WP_048875040.1 | WP_039669867.1 |
| Branched-chain alpha-keto acid dehydrogenase, E1 component, alpha subunit                          | CLERM_651 | WP_048875042.1 | WP_084588725.1 |

Table S3: Enzymes involved in the synthesis of different essential amino acids in *Coxiella* endosymbionts genomes. CERM – *Coxiella* endosymbiont from *R. microplus*;

CRT – *Coxiella* endosymbiont strain from *R. turanicus*; *Coxiella* endosymbiont of *A. americanum*.
